# Supplementary material for: Short-Chain Fatty Acid Levels after Fecal Microbiota Transplantation in a Pediatric Cohort with Recurrent Clostridioides difficile Infection
Source: MDPI journal article supplement (doi:10.3390/metabo13101039), 2023-09-27
Supplement: s1 [file s1]

**Supplemental Table S1: Age and SCFA Profile Comparison Between Healthy Controls & Baseline (Excludes participants over 11 years old in the healthy controls)**

| Characteristic         | Overall, N =16          | <i>C. difficile</i> , N =<br>9 | Healthy<br>Control, N =7 | p - value |
|------------------------|-------------------------|--------------------------------|--------------------------|-----------|
| Age (years)            | 8.25 (4.06)             | 7.78 (4.79)                    | 8.86 (3.13)              | 0.5       |
| Mean across all SCFA's | 20.64 (10.39,<br>25.10) | 11.46 (7.11,<br>19.73)         | 25.55 (22.43,<br>40.68)  | 0.008     |
| Acetic Acid            | 56.98 (23.23,<br>71.97) | 24.25 (16.18,<br>49.72)        | 76.19 (64.89,<br>93.82)  | 0.002     |
| Butyric Acid           | 21.97 (11.59,<br>41.63) | 15.15 (3.43,<br>31.37)         | 41.45 (20.60,<br>51.27)  | 0.11      |
| Formic Acid            | 1.71 (1.52,<br>1.93)    | 1.59 (1.52,<br>1.88)           | 1.79 (1.62,<br>1.97)     | 0.5       |
| Isovaleric Acid        | 1.13 (0.19,<br>3.13)    | 0.66 (0.17,<br>0.91)           | 3.51 (2.40,<br>5.10)     | 0.005     |
| Propionic Acid         | 13.80 (6.97,<br>24.91)  | 7.25 (3.54,<br>13.15)          | 21.60 (16.67,<br>52.08)  | 0.023     |

Supplementary Table S1: SCFA Profile Comparison Between Healthy Controls & Baseline (exclude participants over 11 years old in the healthy controls). Values are presented as mean (SD) and median (IQR). Difference in the value of fecal SCFA values at baseline between healthy controls and the pre-treatment rCDI cohort was assessed via Wilcoxon rank-sum tests.
